# Supplementary material for: Impact on staff of providing non-invasive advanced respiratory support during the COVID-19 pandemic: a qualitative study in an acute hospital
Source: BMJ Open. 2022 Jun 1;12(6):e060674. doi: 10.1136/bmjopen-2021-060674 (PMC9160594; doi:10.1136/bmjopen-2021-060674)
Supplement: Supplementary data [file bmjopen-2021-060674supp001.pdf]

## Appendix A

| Demographic Traits                  | Female | Male |
|-------------------------------------|--------|------|
| Ward Nurses                         | 1      | 0    |
| Specialist Nurses (Palliative Care) | 5      | 0    |
| Junior Doctors (registrar or below) | 3      | 1    |
| Consultants (Acute/General Med)     | 1      | 2    |
| Consultants (Respiratory)           | 2      | 1    |
| Consultants (Palliative Medicine)   | 2      | 1    |
| Physiotherapists                    | 1      | 1    |
| Total                               | 15     | 6    |
